# Supplementary material
Source: Elsevier journal article supplement (http://library.osu.edu/projects/msa/suppmat/v236.i1.pp42-51/mmc6.pdf)
Supplement: mmc6 [file mmc6.pdf]

# $^{48}\text{Ti}^{81}\text{Br}$ Assigned Transitions

Transitions are labeled using four columns, the excited state J value ( $J'$ ), the ground state J value ( $J''$ ), the observed transition wavenumber (Observed) and the fit residual multiplied by  $10^3$  (O-C).

[23.48]<sup>4</sup>Γ<sub>5/2</sub><sup>-4</sup>Φ<sub>3/2</sub>(0,0)

| J'   | J''  | Observed   | O-C  | J'   | J''  | Observed   | O-C   |
|------|------|------------|------|------|------|------------|-------|
| 4.5  | 3.5  | 23375.9354 | 3.2  | 32.5 | 33.5 | 23369.9803 | -1.5  |
| 5.5  | 4.5  | 23376.1386 | 0.7  | 33.5 | 34.5 | 23369.8712 | -1.7  |
| 7.5  | 6.5  | 23376.5575 | 0.7  | 34.5 | 35.5 | 23369.7641 | -2.3  |
| 10.5 | 9.5  | 23377.2023 | -1.7 | 35.5 | 36.5 | 23369.6617 | -0.4  |
| 11.5 | 10.5 | 23377.4255 | 0.7  | 36.5 | 37.5 | 23369.5610 | 0.8   |
| 12.5 | 11.5 | 23377.6456 | -2.4 | 37.5 | 38.5 | 23369.4609 | 0.4   |
| 13.5 | 12.5 | 23377.8671 | -6.7 | 38.5 | 39.5 | 23369.3642 | 1.1   |
| 14.5 | 13.5 | 23378.1016 | -0.4 | 39.5 | 40.5 | 23369.2668 | -1.2  |
| 15.5 | 14.5 | 23378.3324 | -0.3 | 40.5 | 41.5 | 23369.1744 | -0.7  |
| 16.5 | 15.5 | 23378.5643 | -1.6 | 41.5 | 42.5 | 23369.0853 | 0.9   |
| 17.5 | 16.5 | 23378.7974 | -4.2 | 42.5 | 43.5 | 23368.9969 | 1.1   |
| 18.5 | 17.5 | 23379.0313 | -8.4 | 43.5 | 44.5 | 23368.9095 | 0.0   |
| 19.5 | 18.5 | 23379.2784 | -1.8 | 44.5 | 45.5 | 23368.8248 | -0.6  |
| 20.5 | 19.5 | 23379.5203 | -2.9 | 45.5 | 46.5 | 23368.7411 | -2.2  |
| 21.5 | 20.5 | 23379.7648 | -3.8 | 46.5 | 47.5 | 23368.6624 | -1.0  |
| 22.5 | 21.5 | 23380.0146 | -1.8 | 47.5 | 48.5 | 23368.5830 | -2.6  |
| 23.5 | 22.5 | 23380.2668 | 0.1  | 48.5 | 49.5 | 23368.5076 | -2.3  |
| 24.5 | 23.5 | 23380.5177 | -1.6 | 49.5 | 50.5 | 23368.4359 | -0.4  |
| 25.5 | 24.5 | 23380.7752 | 0.9  | 50.5 | 51.5 | 23368.3618 | -2.9  |
| 26.5 | 25.5 | 23381.0320 | 0.3  | 51.5 | 52.5 | 23368.2980 | 2.9   |
| 27.5 | 26.5 | 23381.2902 | -1.2 | 52.5 | 53.5 | 23368.2294 | 1.8   |
| 28.5 | 27.5 | 23381.5530 | -0.5 | 53.5 | 54.5 | 23368.1662 | 4.2   |
| 29.5 | 28.5 | 23381.8156 | -2.4 | 54.5 | 55.5 | 23368.1026 | 4.2   |
| 30.5 | 29.5 | 23382.0861 | 1.4  | 55.5 | 56.5 | 23368.0369 | 0.2   |
| 31.5 | 30.5 | 23382.3496 | -4.2 | 56.5 | 57.5 | 23367.9796 | 2.7   |
| 32.5 | 31.5 | 23382.6261 | 0.9  | 57.5 | 58.5 | 23367.9189 | -0.2  |
| 33.5 | 32.5 | 23382.8973 | -1.5 | 58.5 | 59.5 | 23367.8582 | -4.9  |
| 34.5 | 33.5 | 23383.1738 | -0.9 | 59.5 | 60.5 | 23367.8040 | -4.9  |
| 35.5 | 34.5 | 23383.4544 | 1.6  | 60.5 | 61.5 | 23367.7504 | -6.2  |
| 36.5 | 35.5 | 23383.7315 | -1.7 | 61.5 | 62.5 | 23367.6964 | -9.6  |
| 37.5 | 36.5 | 23384.0137 | -2.1 | 62.5 | 63.5 | 23367.6463 | -10.9 |
| 38.5 | 37.5 | 23384.2989 | -1.7 | 5.5  | 5.5  | 23375.0799 | -3.6  |
| 39.5 | 38.5 | 23384.5865 | -1.1 | 6.5  | 6.5  | 23375.0972 | -2.8  |
| 40.5 | 39.5 | 23384.8777 | 1.0  | 7.5  | 7.5  | 23375.1172 | -1.8  |
| 41.5 | 40.5 | 23385.1666 | -1.4 | 8.5  | 8.5  | 23375.1376 | -2.9  |
| 42.5 | 41.5 | 23385.4601 | -1.3 | 9.5  | 9.5  | 23375.1622 | -2.4  |
| 43.5 | 42.5 | 23385.7560 | -0.9 | 10.5 | 10.5 | 23375.1903 | -0.8  |
| 44.5 | 43.5 | 23386.0505 | -4.1 | 11.5 | 11.5 | 23375.2193 | -0.9  |
| 45.5 | 44.5 | 23386.3497 | -4.5 | 12.5 | 12.5 | 23375.2506 | -1.2  |
| 46.5 | 45.5 | 23386.6533 | -2.7 | 13.5 | 13.5 | 23375.2863 | 0.4   |
| 47.5 | 46.5 | 23386.9572 | -2.5 | 14.5 | 14.5 | 23375.3224 | -0.1  |
| 48.5 | 47.5 | 23387.2630 | -2.5 | 15.5 | 15.5 | 23375.3641 | 2.5   |
| 49.5 | 48.5 | 23387.5706 | -2.6 | 16.5 | 16.5 | 23375.4054 | 2.2   |
| 50.5 | 49.5 | 23387.8811 | -1.8 | 17.5 | 17.5 | 23375.4494 | 2.2   |
| 51.5 | 50.5 | 23388.1923 | -2.3 | 18.5 | 18.5 | 23375.4955 | 1.8   |
| 52.5 | 51.5 | 23388.5059 | -2.2 | 19.5 | 19.5 | 23375.5438 | 1.1   |
| 53.5 | 52.5 | 23388.8211 | -2.5 | 20.5 | 20.5 | 23375.5942 | 0.0   |

|      |      |            |      |      |      |            |      |
|------|------|------------|------|------|------|------------|------|
| 54.5 | 53.5 | 23389.1413 | 0.4  | 21.5 | 21.5 | 23375.6472 | -0.8 |
| 55.5 | 54.5 | 23389.4579 | -2.2 | 22.5 | 22.5 | 23375.7036 | -0.7 |
| 56.5 | 55.5 | 23389.7781 | -3.0 | 23.5 | 23.5 | 23375.7627 | -0.4 |
| 57.5 | 56.5 | 23390.1041 | 0.2  | 24.5 | 24.5 | 23375.8234 | -0.8 |
| 58.5 | 57.5 | 23390.4263 | -2.2 | 25.5 | 25.5 | 23375.8884 | 0.6  |
| 59.5 | 58.5 | 23390.7522 | -2.6 | 26.5 | 26.5 | 23375.9538 | 0.0  |
| 60.5 | 59.5 | 23391.0824 | -0.4 | 27.5 | 27.5 | 23376.0211 | -1.0 |
| 61.5 | 60.5 | 23391.4103 | -2.2 | 28.5 | 28.5 | 23376.0926 | -0.2 |
| 62.5 | 61.5 | 23391.7446 | 0.7  | 29.5 | 29.5 | 23376.1649 | -1.0 |
| 63.5 | 62.5 | 23392.0781 | 1.2  | 30.5 | 30.5 | 23376.2420 | 0.7  |
| 64.5 | 63.5 | 23392.4137 | 2.2  | 31.5 | 31.5 | 23376.3177 | -1.3 |
| 65.5 | 64.5 | 23392.7559 | 8.1  | 32.5 | 32.5 | 23376.3971 | -2.0 |
| 66.5 | 65.5 | 23393.0918 | 6.3  | 33.5 | 33.5 | 23376.4802 | -1.3 |
| 2.5  | 3.5  | 23374.3716 | -6.6 | 34.5 | 34.5 | 23376.5655 | -0.6 |
| 3.5  | 4.5  | 23374.1881 | -7.3 | 35.5 | 35.5 | 23376.6539 | 0.8  |
| 4.5  | 5.5  | 23374.0064 | -8.7 | 36.5 | 36.5 | 23376.7417 | -0.6 |
| 5.5  | 6.5  | 23373.8324 | -4.9 | 37.5 | 37.5 | 23376.8354 | 1.7  |
| 6.5  | 7.5  | 23373.6587 | -3.4 | 38.5 | 38.5 | 23376.9291 | 1.7  |
| 7.5  | 8.5  | 23373.4866 | -2.8 | 39.5 | 39.5 | 23377.0222 | -1.1 |
| 8.5  | 9.5  | 23373.3145 | -4.8 | 40.5 | 40.5 | 23377.1193 | -2.1 |
| 9.5  | 10.5 | 23373.1490 | -2.7 | 41.5 | 41.5 | 23377.2203 | -1.4 |
| 10.5 | 11.5 | 23372.9853 | -1.3 | 42.5 | 42.5 | 23377.3217 | -2.4 |
| 11.5 | 12.5 | 23372.8228 | -1.2 | 43.5 | 43.5 | 23377.4330 | 4.3  |
| 12.5 | 13.5 | 23372.6590 | -5.0 | 44.5 | 44.5 | 23377.5352 | -0.2 |
| 13.5 | 14.5 | 23372.5053 | -1.1 | 45.5 | 45.5 | 23377.6456 | 1.4  |
| 14.5 | 15.5 | 23372.3512 | -0.2 | 46.5 | 46.5 | 23377.7540 | -1.1 |
| 15.5 | 16.5 | 23372.1964 | -2.5 | 47.5 | 47.5 | 23377.8671 | -0.9 |
| 16.5 | 17.5 | 23372.0459 | -2.9 | 48.5 | 48.5 | 23377.9792 | -3.9 |
| 17.5 | 18.5 | 23371.8995 | -1.8 | 49.5 | 49.5 | 23378.1016 | 1.5  |
| 18.5 | 19.5 | 23371.7524 | -3.9 | 50.5 | 50.5 | 23378.2174 | -1.7 |
| 19.5 | 20.5 | 23371.6103 | -3.4 | 52.5 | 52.5 | 23378.4629 | -0.2 |
| 20.5 | 21.5 | 23371.4716 | -2.0 | 53.5 | 53.5 | 23378.5867 | -1.3 |
| 21.5 | 22.5 | 23371.3328 | -3.2 | 54.5 | 54.5 | 23378.7104 | -4.5 |
| 22.5 | 23.5 | 23371.2000 | -0.8 | 56.5 | 56.5 | 23378.9739 | -0.3 |
| 23.5 | 24.5 | 23371.0686 | 0.6  | 57.5 | 57.5 | 23379.0993 | -7.3 |
| 24.5 | 25.5 | 23370.9342 | -3.5 | 58.5 | 58.5 | 23379.2437 | 2.8  |
| 25.5 | 26.5 | 23370.8094 | -0.5 | 59.5 | 59.5 | 23379.3738 | -3.1 |
| 26.5 | 27.5 | 23370.6807 | -3.7 | 61.5 | 61.5 | 23379.6537 | -0.6 |
| 27.5 | 28.5 | 23370.5616 | 0.3  | 62.5 | 62.5 | 23379.8012 | 5.6  |
| 28.5 | 29.5 | 23370.4402 | -0.5 | 63.5 | 63.5 | 23379.9402 | 1.6  |
| 29.5 | 30.5 | 23370.3208 | -1.6 | 64.5 | 64.5 | 23380.0874 | 4.2  |
| 30.5 | 31.5 | 23370.2063 | -0.2 | 65.5 | 65.5 | 23380.2355 | 6.0  |
| 31.5 | 32.5 | 23370.0923 | -0.7 | 66.5 | 66.5 | 23380.3852 | 7.9  |

[23.48]<sup>4</sup>Γ<sub>5/2</sub><sup>-4</sup>Φ<sub>5/2</sub>(0,0)

| J'  | J'' | Observed   | O-C | J'   | J''  | Observed   | O-C  |
|-----|-----|------------|-----|------|------|------------|------|
| 3.5 | 2.5 | 23244.7788 | 8.8 | 11.5 | 12.5 | 23241.8477 | 0.4  |
| 4.5 | 3.5 | 23244.9796 | 7.2 | 12.5 | 13.5 | 23241.6833 | -1.0 |
| 5.5 | 4.5 | 23245.1813 | 4.3 | 13.5 | 14.5 | 23241.5269 | 3.3  |

|      |      |            |      |      |      |            |      |
|------|------|------------|------|------|------|------------|------|
| 6.5  | 5.5  | 23245.3842 | 0.2  | 14.5 | 15.5 | 23241.3687 | 3.6  |
| 7.5  | 6.5  | 23245.5937 | 0.4  | 15.5 | 16.5 | 23241.2110 | 2.0  |
| 8.5  | 7.5  | 23245.8055 | 0.6  | 16.5 | 17.5 | 23241.0572 | 2.1  |
| 9.5  | 8.5  | 23246.0190 | 0.3  | 17.5 | 18.5 | 23240.9038 | 0.3  |
| 11.5 | 10.5 | 23246.4530 | -0.3 | 18.5 | 19.5 | 23240.7570 | 2.8  |
| 12.5 | 11.5 | 23246.6755 | 1.4  | 19.5 | 20.5 | 23240.6079 | 0.8  |
| 13.5 | 12.5 | 23246.8986 | 1.5  | 20.5 | 21.5 | 23240.4631 | 0.8  |
| 14.5 | 13.5 | 23247.1238 | 1.5  | 21.5 | 22.5 | 23240.3207 | 1.0  |
| 15.5 | 14.5 | 23247.3496 | -0.2 | 22.5 | 23.5 | 23240.1819 | 2.6  |
| 16.5 | 15.5 | 23247.5797 | 0.1  | 23.5 | 24.5 | 23240.0422 | 1.0  |
| 17.5 | 16.5 | 23247.8152 | 3.6  | 24.5 | 25.5 | 23239.9085 | 3.2  |
| 18.5 | 17.5 | 23248.0444 | -1.5 | 25.5 | 26.5 | 23239.7750 | 3.4  |
| 19.5 | 18.5 | 23248.2862 | 3.8  | 26.5 | 27.5 | 23239.6413 | 1.2  |
| 20.5 | 19.5 | 23248.5231 | 2.0  | 27.5 | 28.5 | 23239.5139 | 3.1  |
| 21.5 | 20.5 | 23248.7666 | 4.6  | 28.5 | 29.5 | 23239.3871 | 3.4  |
| 22.5 | 21.5 | 23249.0063 | 1.2  | 29.5 | 30.5 | 23239.2610 | 2.3  |
| 23.5 | 22.5 | 23249.2519 | 1.5  | 30.5 | 31.5 | 23239.1379 | 2.0  |
| 24.5 | 23.5 | 23249.4997 | 1.9  | 31.5 | 32.5 | 23239.0148 | -0.5 |
| 25.5 | 24.5 | 23249.7519 | 4.4  | 32.5 | 33.5 | 23238.8991 | 2.4  |
| 26.5 | 25.5 | 23250.0011 | 1.8  | 33.5 | 34.5 | 23238.7847 | 4.4  |
| 27.5 | 26.5 | 23250.2552 | 2.0  | 34.5 | 35.5 | 23238.6676 | 1.6  |
| 28.5 | 27.5 | 23250.5124 | 3.1  | 35.5 | 36.5 | 23238.5555 | 1.7  |
| 29.5 | 28.5 | 23250.7686 | 1.1  | 36.5 | 37.5 | 23238.4454 | 1.8  |
| 30.5 | 29.5 | 23251.0268 | -0.9 | 37.5 | 38.5 | 23238.3357 | 0.1  |
| 32.5 | 31.5 | 23251.5581 | 3.5  | 38.5 | 39.5 | 23238.2313 | 1.8  |
| 33.5 | 32.5 | 23251.8253 | 4.2  | 39.5 | 40.5 | 23238.1282 | 2.7  |
| 34.5 | 33.5 | 23252.0918 | 2.1  | 40.5 | 41.5 | 23238.0268 | 3.3  |
| 35.5 | 34.5 | 23252.3634 | 3.2  | 41.5 | 42.5 | 23237.9244 | 0.8  |
| 36.5 | 35.5 | 23252.6349 | 2.0  | 42.5 | 43.5 | 23237.8270 | 1.5  |
| 37.5 | 36.5 | 23252.9117 | 4.2  | 43.5 | 44.5 | 23237.7290 | -0.5 |
| 38.5 | 37.5 | 23253.1906 | 6.5  | 44.5 | 45.5 | 23237.6349 | -0.5 |
| 39.5 | 38.5 | 23253.4631 | 0.5  | 45.5 | 46.5 | 23237.5432 | -0.1 |
| 40.5 | 39.5 | 23253.7430 | -0.1 | 46.5 | 47.5 | 23237.4541 | 1.1  |
| 41.5 | 40.5 | 23254.0208 | -4.8 | 47.5 | 48.5 | 23237.3647 | 0.0  |
| 42.5 | 41.5 | 23254.3127 | 2.8  | 48.5 | 49.5 | 23237.2793 | 1.1  |
| 43.5 | 42.5 | 23254.5996 | 3.5  | 49.5 | 50.5 | 23237.1976 | 4.1  |
| 44.5 | 43.5 | 23254.8868 | 2.5  | 50.5 | 51.5 | 23237.1125 | 1.8  |
| 45.5 | 44.5 | 23255.1770 | 2.8  | 51.5 | 52.5 | 23237.0248 | -5.0 |
| 46.5 | 45.5 | 23255.4672 | 1.2  | 53.5 | 54.5 | 23236.8768 | 3.6  |
| 47.5 | 46.5 | 23255.7603 | 0.7  | 54.5 | 55.5 | 23236.7990 | 1.5  |
| 48.5 | 47.5 | 23256.0551 | 0.1  | 55.5 | 56.5 | 23236.7249 | 1.3  |
| 49.5 | 48.5 | 23256.3497 | -2.5 | 56.5 | 57.5 | 23236.6499 | -1.4 |
| 50.5 | 49.5 | 23256.6489 | -2.3 | 57.5 | 58.5 | 23236.5848 | 4.0  |
| 51.5 | 50.5 | 23256.9491 | -2.7 | 58.5 | 59.5 | 23236.5154 | 3.5  |
| 52.5 | 51.5 | 23257.2553 | 1.1  | 59.5 | 60.5 | 23236.4461 | 1.5  |
| 53.5 | 52.5 | 23257.5552 | -3.0 | 60.5 | 61.5 | 23236.3787 | -0.3 |
| 54.5 | 53.5 | 23257.8624 | -1.5 | 61.5 | 62.5 | 23236.3163 | 1.4  |
| 55.5 | 54.5 | 23258.1746 | 3.3  | 6.5  | 6.5  | 23244.1390 | 2.6  |
| 56.5 | 55.5 | 23258.4752 | -5.0 | 7.5  | 7.5  | 23244.1574 | 3.6  |

|      |      |            |      |      |      |            |     |
|------|------|------------|------|------|------|------------|-----|
| 57.5 | 56.5 | 23258.7890 | -1.7 | 8.5  | 8.5  | 23244.1764 | 2.9 |
| 58.5 | 57.5 | 23259.1036 | 0.8  | 9.5  | 9.5  | 23244.1974 | 2.0 |
| 59.5 | 58.5 | 23259.4151 | -1.4 | 10.5 | 10.5 | 23244.2228 | 3.1 |
| 60.5 | 59.5 | 23259.7360 | 4.4  | 11.5 | 11.5 | 23244.2494 | 3.1 |
| 3.5  | 4.5  | 23243.2337 | -0.8 | 12.5 | 12.5 | 23244.2788 | 3.7 |
| 4.5  | 5.5  | 23243.0543 | 1.3  | 13.5 | 13.5 | 23244.3091 | 2.9 |
| 5.5  | 6.5  | 23242.8711 | -2.7 | 14.5 | 14.5 | 23244.3408 | 1.2 |
| 6.5  | 7.5  | 23242.6977 | 0.7  | 15.5 | 15.5 | 23244.3802 | 4.9 |
| 7.5  | 8.5  | 23242.5229 | 0.5  | 16.5 | 16.5 | 23244.4149 | 1.6 |
| 8.5  | 9.5  | 23242.3504 | 0.2  | 17.5 | 17.5 | 23244.4569 | 3.4 |
| 9.5  | 10.5 | 23242.1826 | 2.4  | 18.5 | 18.5 | 23244.4959 | 0.0 |
| 10.5 | 11.5 | 23242.0135 | 0.9  |      |      |            |     |

[23.48]<sup>4</sup>Γ<sub>7/2</sub>-<sup>4</sup>Φ<sub>5/2</sub> (0,0)

| J'   | J''  | Observed   | O-C  | J'   | J''  | Observed   | O-C   |
|------|------|------------|------|------|------|------------|-------|
| 3.5  | 2.5  | 23448.2233 | -4.8 | 23.5 | 24.5 | 23444.0209 | 2.3   |
| 4.5  | 3.5  | 23448.4418 | 3.0  | 24.5 | 25.5 | 23443.9295 | 1.4   |
| 5.5  | 4.5  | 23448.6523 | -1.3 | 25.5 | 26.5 | 23443.8451 | 3.4   |
| 6.5  | 5.5  | 23448.8754 | 2.7  | 26.5 | 27.5 | 23443.7601 | 0.8   |
| 7.5  | 6.5  | 23449.0996 | 3.7  | 27.5 | 28.5 | 23443.6824 | 1.4   |
| 8.5  | 7.5  | 23449.3254 | 2.2  | 28.5 | 29.5 | 23443.6086 | 2.0   |
| 9.5  | 8.5  | 23449.5509 | -3.8 | 29.5 | 30.5 | 23443.5386 | 2.2   |
| 12.5 | 11.5 | 23450.2721 | -1.9 | 30.5 | 31.5 | 23443.4695 | -0.6  |
| 13.5 | 12.5 | 23450.5196 | -2.5 | 31.5 | 32.5 | 23443.4105 | 2.7   |
| 14.5 | 13.5 | 23450.7748 | 0.6  | 32.5 | 33.5 | 23443.3491 | -0.4  |
| 15.5 | 14.5 | 23451.0346 | 4.1  | 33.5 | 34.5 | 23443.2981 | 3.0   |
| 16.5 | 15.5 | 23451.2928 | 1.9  | 34.5 | 35.5 | 23443.2481 | 3.4   |
| 17.5 | 16.5 | 23451.5586 | 3.2  | 35.5 | 36.5 | 23443.1957 | -2.5  |
| 18.5 | 17.5 | 23451.8285 | 4.6  | 36.5 | 37.5 | 23443.1502 | -5.5  |
| 19.5 | 18.5 | 23452.0980 | 1.4  | 37.5 | 38.5 | 23443.1153 | -1.7  |
| 20.5 | 19.5 | 23452.3725 | -0.8 | 38.5 | 39.5 | 23443.0789 | -3.4  |
| 21.5 | 20.5 | 23452.6557 | 1.7  | 39.5 | 40.5 | 23443.0449 | -6.5  |
| 22.5 | 21.5 | 23452.9406 | 1.7  | 4.5  | 4.5  | 23447.5657 | -9.4  |
| 23.5 | 22.5 | 23453.2338 | 6.1  | 5.5  | 5.5  | 23447.5874 | -10.6 |
| 24.5 | 23.5 | 23453.5227 | 2.1  | 6.5  | 6.5  | 23447.6194 | -5.7  |
| 25.5 | 24.5 | 23453.8232 | 5.7  | 7.5  | 7.5  | 23447.6494 | -7.0  |
| 26.5 | 25.5 | 23454.1227 | 4.3  | 8.5  | 8.5  | 23447.6834 | -8.4  |
| 27.5 | 26.5 | 23454.4293 | 6.0  | 9.5  | 9.5  | 23447.7251 | -6.3  |
| 28.5 | 27.5 | 23454.7327 | 0.5  | 10.5 | 10.5 | 23447.7695 | -5.7  |
| 29.5 | 28.5 | 23455.0497 | 4.6  | 11.5 | 11.5 | 23447.8175 | -5.6  |
| 30.5 | 29.5 | 23455.3653 | 3.4  | 12.5 | 12.5 | 23447.8702 | -4.9  |
| 31.5 | 30.5 | 23455.6852 | 2.6  | 13.5 | 13.5 | 23447.9269 | -4.4  |
| 32.5 | 31.5 | 23456.0090 | 1.7  | 14.5 | 14.5 | 23447.9896 | -2.0  |
| 33.5 | 32.5 | 23456.3373 | 1.4  | 15.5 | 15.5 | 23448.0572 | 1.2   |
| 34.5 | 33.5 | 23456.6692 | 0.9  | 16.5 | 16.5 | 23448.1259 | 1.4   |
| 35.5 | 34.5 | 23457.0017 | -3.0 | 17.5 | 17.5 | 23448.1990 | 1.8   |
| 36.5 | 35.5 | 23457.3432 | -1.7 | 18.5 | 18.5 | 23448.2754 | 1.5   |
| 37.5 | 36.5 | 23457.6904 | 1.5  | 19.5 | 19.5 | 23448.3571 | 2.3   |
| 38.5 | 37.5 | 23458.0347 | -2.1 | 20.5 | 20.5 | 23448.4418 | 2.1   |

|      |      |            |       |      |      |            |      |
|------|------|------------|-------|------|------|------------|------|
| 39.5 | 38.5 | 23458.3839 | -4.6  | 21.5 | 21.5 | 23448.5329 | 4.1  |
| 40.5 | 39.5 | 23458.7365 | -7.5  | 22.5 | 22.5 | 23448.6279 | 6.1  |
| 5.5  | 6.5  | 23446.3292 | -21.2 | 23.5 | 23.5 | 23448.7260 | 7.0  |
| 6.5  | 7.5  | 23446.1781 | -7.5  | 24.5 | 24.5 | 23448.8301 | 9.9  |
| 7.5  | 8.5  | 23446.0193 | -5.7  | 25.5 | 25.5 | 23448.9348 | 9.4  |
| 8.5  | 9.5  | 23445.8655 | -3.0  | 26.5 | 26.5 | 23449.0436 | 8.9  |
| 9.5  | 10.5 | 23445.7134 | -2.8  | 27.5 | 27.5 | 23449.1550 | 7.0  |
| 10.5 | 11.5 | 23445.5653 | -2.8  | 28.5 | 28.5 | 23449.2727 | 7.5  |
| 11.5 | 12.5 | 23445.4196 | -4.5  | 29.5 | 29.5 | 23449.3881 | 1.6  |
| 12.5 | 13.5 | 23445.2781 | -6.2  | 30.5 | 30.5 | 23449.5142 | 2.5  |
| 13.5 | 14.5 | 23445.1490 | 0.4   | 31.5 | 31.5 | 23449.6430 | 2.0  |
| 14.5 | 15.5 | 23445.0189 | 1.9   | 33.5 | 33.5 | 23449.9138 | 2.6  |
| 15.5 | 16.5 | 23444.8865 | -3.1  | 34.5 | 34.5 | 23450.0526 | 0.4  |
| 16.5 | 17.5 | 23444.7644 | -2.0  | 35.5 | 35.5 | 23450.1974 | 0.3  |
| 17.5 | 18.5 | 23444.6454 | -1.8  | 36.5 | 36.5 | 23450.3448 | -1.2 |
| 18.5 | 19.5 | 23444.5303 | -1.9  | 37.5 | 37.5 | 23450.4972 | -1.5 |
| 19.5 | 20.5 | 23444.4229 | 1.6   | 38.5 | 38.5 | 23450.6520 | -3.2 |
| 20.5 | 21.5 | 23444.3135 | -1.0  | 39.5 | 39.5 | 23450.8131 | -2.5 |
| 21.5 | 22.5 | 23444.2111 | -0.6  | 40.5 | 40.5 | 23450.9756 | -4.2 |
| 22.5 | 23.5 | 23444.1153 | 2.2   |      |      |            |      |

[23.48]<sup>4</sup>Γ<sub>7/2</sub>-<sup>4</sup>Φ<sub>7/2</sub> (0,0)

| J'   | J''  | Observed   | O-C  | J'   | J''  | Observed   | O-C  |
|------|------|------------|------|------|------|------------|------|
| 5.5  | 4.5  | 23317.7963 | 5.3  | 13.5 | 14.5 | 23314.2634 | -0.5 |
| 6.5  | 5.5  | 23318.0051 | -3.7 | 14.5 | 15.5 | 23314.1287 | -0.2 |
| 7.5  | 6.5  | 23318.2299 | -0.7 | 15.5 | 16.5 | 23313.9983 | 0.4  |
| 9.5  | 8.5  | 23318.6849 | -1.0 | 16.5 | 17.5 | 23313.8688 | -1.9 |
| 10.5 | 9.5  | 23318.9181 | -1.3 | 17.5 | 18.5 | 23313.7461 | -1.4 |
| 11.5 | 10.5 | 23319.1555 | -1.4 | 18.5 | 19.5 | 23313.6270 | -1.2 |
| 12.5 | 11.5 | 23319.3986 | 0.3  | 19.5 | 20.5 | 23313.5209 | 8.1  |
| 13.5 | 12.5 | 23319.6415 | -2.0 | 20.5 | 21.5 | 23313.4005 | -0.7 |
| 14.5 | 13.5 | 23319.8927 | 0.0  | 21.5 | 22.5 | 23313.2924 | -1.2 |
| 15.5 | 14.5 | 23320.1452 | -0.6 | 22.5 | 23.5 | 23313.1900 | 0.2  |
| 16.5 | 15.5 | 23320.4080 | 5.2  | 23.5 | 24.5 | 23313.0910 | 1.2  |
| 17.5 | 16.5 | 23320.6645 | 0.9  | 24.5 | 25.5 | 23312.9916 | -2.1 |
| 18.5 | 17.5 | 23320.9314 | 3.1  | 25.5 | 26.5 | 23312.9002 | -1.3 |
| 19.5 | 18.5 | 23321.1992 | 2.3  | 26.5 | 27.5 | 23312.8111 | -2.0 |
| 20.5 | 19.5 | 23321.4681 | -1.2 | 27.5 | 28.5 | 23312.7274 | -1.1 |
| 21.5 | 20.5 | 23321.7476 | 2.1  | 28.5 | 29.5 | 23312.6577 | 10.0 |
| 22.5 | 21.5 | 23322.0288 | 3.2  | 29.5 | 30.5 | 23312.5703 | -0.4 |
| 23.5 | 22.5 | 23322.3147 | 5.2  | 30.5 | 31.5 | 23312.4949 | -2.6 |
| 24.5 | 23.5 | 23322.5992 | 1.9  | 31.5 | 32.5 | 23312.4268 | -1.3 |
| 25.5 | 24.5 | 23322.8881 | -0.7 | 32.5 | 33.5 | 23312.3605 | -1.9 |
| 26.5 | 25.5 | 23323.1896 | 5.5  | 33.5 | 34.5 | 23312.2971 | -3.4 |
| 27.5 | 26.5 | 23323.4875 | 4.3  | 34.5 | 35.5 | 23312.2367 | -5.6 |
| 28.5 | 27.5 | 23323.7880 | 2.0  | 36.5 | 37.5 | 23312.1350 | -2.0 |
| 29.5 | 28.5 | 23324.0944 | 1.8  | 37.5 | 38.5 | 23312.0833 | -6.7 |
| 30.5 | 29.5 | 23324.4073 | 4.4  | 38.5 | 39.5 | 23312.0402 | -6.4 |
| 31.5 | 30.5 | 23324.7175 | 0.5  | 5.5  | 5.5  | 23316.7312 | -2.9 |

|      |      |            |      |      |      |            |      |
|------|------|------------|------|------|------|------------|------|
| 32.5 | 31.5 | 23325.0374 | 2.7  | 6.5  | 6.5  | 23316.7566 | -3.2 |
| 33.5 | 32.5 | 23325.3593 | 3.2  | 7.5  | 7.5  | 23316.7882 | -1.2 |
| 34.5 | 33.5 | 23325.6842 | 2.9  | 8.5  | 8.5  | 23316.8229 | -0.1 |
| 35.5 | 34.5 | 23326.0088 | -1.2 | 9.5  | 9.5  | 23316.8603 | -0.2 |
| 36.5 | 35.5 | 23326.3383 | -4.2 | 10.5 | 10.5 | 23316.9010 | -0.9 |
| 37.5 | 36.5 | 23326.6699 | -8.6 | 11.5 | 11.5 | 23316.9497 | 2.4  |
| 38.5 | 37.5 | 23327.0130 | -5.2 | 12.5 | 12.5 | 23316.9977 | 1.2  |
| 8.5  | 9.5  | 23314.9926 | -5.0 | 13.5 | 13.5 | 23317.0541 | 4.4  |
| 9.5  | 10.5 | 23314.8405 | -2.5 | 14.5 | 14.5 | 23317.1151 | 8.3  |
| 10.5 | 11.5 | 23314.6904 | -1.9 | 15.5 | 15.5 | 23317.1678 | -0.1 |
| 11.5 | 12.5 | 23314.5430 | -2.5 | 16.5 | 16.5 | 23317.2359 | 3.1  |
| 12.5 | 13.5 | 23314.3995 | -3.2 | 17.5 | 17.5 | 23317.3043 | 2.7  |

[23.48]<sup>4</sup>Γ<sub>9/2</sub>-<sup>4</sup>Φ<sub>7/2</sub> (0,0)

| J'   | J''  | Observed   | O-C   | J'   | J''  | Observed   | O-C  |
|------|------|------------|-------|------|------|------------|------|
| 5.5  | 4.5  | 23527.6578 | -0.2  | 13.5 | 14.5 | 23524.2772 | -3.0 |
| 6.5  | 5.5  | 23527.8919 | 3.9   | 14.5 | 15.5 | 23524.1687 | -3.6 |
| 7.5  | 6.5  | 23528.1270 | 3.3   | 15.5 | 16.5 | 23524.0684 | -1.7 |
| 8.5  | 7.5  | 23528.3676 | 2.3   | 16.5 | 17.5 | 23523.9733 | -0.4 |
| 9.5  | 8.5  | 23528.6120 | -0.7  | 17.5 | 18.5 | 23523.8793 | -3.8 |
| 10.5 | 9.5  | 23528.8666 | 0.8   | 18.5 | 19.5 | 23523.7939 | -4.4 |
| 11.5 | 10.5 | 23529.1231 | -1.6  | 19.5 | 20.5 | 23523.7155 | -3.6 |
| 12.5 | 11.5 | 23529.3933 | 3.9   | 20.5 | 21.5 | 23523.6424 | -3.3 |
| 13.5 | 12.5 | 23529.6605 | 0.6   | 21.5 | 22.5 | 23523.5757 | -2.4 |
| 14.5 | 13.5 | 23529.9397 | 3.6   | 22.5 | 23.5 | 23523.5103 | -5.8 |
| 15.5 | 14.5 | 23530.2155 | -2.6  | 23.5 | 24.5 | 23523.4540 | -5.8 |
| 16.5 | 15.5 | 23530.5127 | 6.9   | 24.5 | 25.5 | 23523.4029 | -6.4 |
| 17.5 | 16.5 | 23530.8066 | 7.4   | 25.5 | 26.5 | 23523.3589 | -5.5 |
| 18.5 | 17.5 | 23531.1041 | 5.7   | 26.5 | 27.5 | 23523.3215 | -3.6 |
| 19.5 | 18.5 | 23531.3987 | -4.5  | 27.5 | 28.5 | 23523.2848 | -6.8 |
| 20.5 | 19.5 | 23531.7212 | 7.4   | 28.5 | 29.5 | 23523.2732 | 9.6  |
| 21.5 | 20.5 | 23532.0371 | 7.1   | 29.5 | 30.5 | 23523.2429 | 1.6  |
| 22.5 | 21.5 | 23532.3590 | 7.0   | 30.5 | 31.5 | 23523.2165 | -8.1 |
| 23.5 | 22.5 | 23532.6846 | 5.0   | 5.5  | 5.5  | 23526.5975 | -3.7 |
| 24.5 | 23.5 | 23533.0018 | -11.0 | 6.5  | 6.5  | 23526.6395 | 0.5  |
| 25.5 | 24.5 | 23533.3540 | 2.3   | 7.5  | 7.5  | 23526.6809 | -1.7 |
| 26.5 | 25.5 | 23533.6986 | 2.4   | 9.5  | 9.5  | 23526.7866 | -0.7 |
| 27.5 | 26.5 | 23534.0482 | 1.9   | 10.5 | 10.5 | 23526.8480 | -0.3 |
| 28.5 | 27.5 | 23534.4051 | 3.2   | 11.5 | 11.5 | 23526.9147 | -0.4 |
| 29.5 | 28.5 | 23534.7670 | 3.8   | 12.5 | 12.5 | 23526.9844 | -3.3 |
| 30.5 | 29.5 | 23535.1289 | -1.1  | 13.5 | 13.5 | 23527.0611 | -5.0 |
| 31.5 | 30.5 | 23535.5055 | 3.1   | 14.5 | 14.5 | 23527.1505 | 0.3  |
| 32.5 | 31.5 | 23535.8808 | 0.5   | 15.5 | 15.5 | 23527.2403 | 0.2  |
| 9.5  | 10.5 | 23524.7679 | -1.8  | 16.5 | 16.5 | 23527.3376 | 1.8  |
| 10.5 | 11.5 | 23524.6351 | -3.6  | 17.5 | 17.5 | 23527.4443 | 7.1  |
| 11.5 | 12.5 | 23524.5117 | -1.7  | 18.5 | 18.5 | 23527.5524 | 8.1  |
| 12.5 | 13.5 | 23524.3943 | 0.4   |      |      |            |      |

[23.61]<sup>4</sup>Γ<sub>5/2</sub>-<sup>4</sup>Φ<sub>3/2</sub> (0,0)

| J'   | J''  | Observed   | O-C  | J'   | J''  | Observed   | O-C  |
|------|------|------------|------|------|------|------------|------|
| 2.5  | 1.5  | 23499.6947 | 2.6  | 9.5  | 10.5 | 23497.4684 | 3.0  |
| 3.5  | 2.5  | 23499.9052 | 1.0  | 10.5 | 11.5 | 23497.3379 | 2.8  |
| 4.5  | 3.5  | 23500.1305 | 8.3  | 11.5 | 12.5 | 23497.2100 | -0.6 |
| 5.5  | 4.5  | 23500.3522 | 6.2  | 12.5 | 13.5 | 23497.0905 | -1.5 |
| 6.5  | 5.5  | 23500.5814 | 5.8  | 13.5 | 14.5 | 23496.9793 | 0.1  |
| 7.5  | 6.5  | 23500.8165 | 5.4  | 14.5 | 15.5 | 23496.8704 | -2.0 |
| 8.5  | 7.5  | 23501.0576 | 5.2  | 15.5 | 16.5 | 23496.7694 | -2.0 |
| 9.5  | 8.5  | 23501.3035 | 4.0  | 16.5 | 17.5 | 23496.6758 | -0.5 |
| 10.5 | 9.5  | 23501.5553 | 2.8  | 17.5 | 18.5 | 23496.5852 | -2.0 |
| 11.5 | 10.5 | 23501.8158 | 4.5  | 18.5 | 19.5 | 23496.5010 | -2.9 |
| 12.5 | 11.5 | 23502.0793 | 3.3  | 19.5 | 20.5 | 23496.4244 | -2.2 |
| 13.5 | 12.5 | 23502.3525 | 5.9  | 20.5 | 21.5 | 23496.3490 | -6.2 |
| 14.5 | 13.5 | 23502.6257 | 2.7  | 22.5 | 23.5 | 23496.2275 | -2.8 |
| 15.5 | 14.5 | 23502.9160 | 10.7 | 23.5 | 24.5 | 23496.1746 | -2.2 |
| 16.5 | 15.5 | 23503.1944 | 1.0  | 24.5 | 25.5 | 23496.1275 | -1.7 |
| 17.5 | 16.5 | 23503.4916 | 4.2  | 26.5 | 27.5 | 23496.0548 | 2.8  |
| 18.5 | 17.5 | 23503.7919 | 4.6  | 27.5 | 28.5 | 23496.0239 | 1.5  |
| 19.5 | 18.5 | 23504.0951 | 2.0  | 28.5 | 29.5 | 23496.0089 | 10.0 |
| 20.5 | 19.5 | 23504.4090 | 4.2  | 29.5 | 30.5 | 23495.9937 | 12.4 |
| 21.5 | 20.5 | 23504.7268 | 4.4  | 30.5 | 31.5 | 23495.9789 | 9.0  |
| 22.5 | 21.5 | 23505.0467 | 0.8  | 31.5 | 32.5 | 23495.9764 | 12.0 |
| 23.5 | 22.5 | 23505.3747 | -0.7 | 32.5 | 33.5 | 23495.9789 | 13.8 |
| 24.5 | 23.5 | 23505.7120 | 1.3  | 33.5 | 34.5 | 23495.9937 | 21.9 |
| 25.5 | 24.5 | 23506.0479 | -4.2 | 34.5 | 35.5 | 23496.0017 | 17.1 |
| 26.5 | 25.5 | 23506.3977 | -1.6 | 2.5  | 2.5  | 23499.2110 | -1.8 |
| 27.5 | 26.5 | 23506.7517 | -0.8 | 3.5  | 3.5  | 23499.2367 | 3.5  |
| 28.5 | 27.5 | 23507.1103 | -1.4 | 4.5  | 4.5  | 23499.2600 | 0.6  |
| 29.5 | 28.5 | 23507.4752 | -1.7 | 5.5  | 5.5  | 23499.2924 | 0.9  |
| 30.5 | 29.5 | 23507.8458 | -2.3 | 6.5  | 6.5  | 23499.3274 | -2.1 |
| 31.5 | 30.5 | 23508.2237 | -1.6 | 7.5  | 7.5  | 23499.3718 | -1.4 |
| 32.5 | 31.5 | 23508.6062 | -2.2 | 8.5  | 8.5  | 23499.4192 | -3.6 |
| 33.5 | 32.5 | 23508.9930 | -4.7 | 9.5  | 9.5  | 23499.4785 | 0.2  |
| 34.5 | 33.5 | 23509.3892 | -3.7 | 10.5 | 10.5 | 23499.5399 | 0.3  |
| 35.5 | 34.5 | 23509.7907 | -3.5 | 11.5 | 11.5 | 23499.6093 | 2.5  |
| 36.5 | 35.5 | 23510.2007 | -0.9 | 12.5 | 12.5 | 23499.6800 | 0.2  |
| 37.5 | 36.5 | 23510.6110 | -4.1 | 13.5 | 13.5 | 23499.7611 | 2.4  |
| 38.5 | 37.5 | 23511.0323 | -2.4 | 14.5 | 14.5 | 23499.8414 | -2.1 |
| 39.5 | 38.5 | 23511.4573 | -3.1 | 15.5 | 15.5 | 23499.9352 | 1.1  |
| 40.5 | 39.5 | 23511.8902 | -2.0 | 16.5 | 16.5 | 23500.0313 | 0.6  |
| 41.5 | 40.5 | 23512.3275 | -2.7 | 17.5 | 17.5 | 23500.1353 | 2.2  |
| 42.5 | 41.5 | 23512.7738 | -0.5 | 18.5 | 18.5 | 23500.2434 | 2.0  |
| 43.5 | 42.5 | 23513.2235 | -1.1 | 19.5 | 19.5 | 23500.3585 | 2.9  |
| 44.5 | 43.5 | 23513.6806 | -0.5 | 20.5 | 20.5 | 23500.4776 | 1.8  |
| 45.5 | 44.5 | 23514.1440 | 0.2  | 21.5 | 21.5 | 23500.6020 | 0.1  |
| 46.5 | 45.5 | 23514.6135 | 0.7  | 22.5 | 22.5 | 23500.7367 | 2.8  |
| 47.5 | 46.5 | 23515.0865 | -1.5 | 23.5 | 23.5 | 23500.8742 | 2.4  |
| 48.5 | 47.5 | 23515.5695 | 0.1  | 24.5 | 24.5 | 23501.0173 | 1.6  |

|      |      |            |      |      |      |            |      |
|------|------|------------|------|------|------|------------|------|
| 49.5 | 48.5 | 23516.0568 | -0.4 | 25.5 | 25.5 | 23501.1677 | 2.1  |
| 50.5 | 49.5 | 23516.5520 | 0.8  | 26.5 | 26.5 | 23501.3224 | 1.0  |
| 51.5 | 50.5 | 23517.0609 | 9.3  | 27.5 | 27.5 | 23501.4808 | -2.4 |
| 2.5  | 3.5  | 23498.5462 | 4.4  | 28.5 | 28.5 | 23501.6537 | 2.7  |
| 3.5  | 4.5  | 23498.3745 | 4.0  | 29.5 | 29.5 | 23501.8218 | -3.0 |
| 4.5  | 5.5  | 23498.2086 | 3.6  | 30.5 | 30.5 | 23502.0035 | -1.1 |
| 5.5  | 6.5  | 23498.0483 | 2.9  | 31.5 | 31.5 | 23502.2012 | 10.7 |
| 6.5  | 7.5  | 23497.8921 | 0.5  | 32.5 | 32.5 | 23502.3832 | 0.8  |
| 7.5  | 8.5  | 23497.7437 | 0.0  | 33.5 | 33.5 | 23502.5876 | 7.3  |
| 8.5  | 9.5  | 23497.6019 | 0.3  | 34.5 | 34.5 | 23502.7925 | 8.1  |

[23.61]<sup>4</sup>Γ<sub>5/2</sub>-<sup>4</sup>Φ<sub>5/2</sub> (0,0)

| J'   | J''  | Observed   | O-C  | J'   | J''  | Observed   | O-C  |
|------|------|------------|------|------|------|------------|------|
| 4.5  | 3.5  | 23369.1592 | -3.1 | 40.5 | 39.5 | 23380.7533 | -5.3 |
| 5.5  | 4.5  | 23369.3847 | -0.4 | 41.5 | 40.5 | 23381.1835 | -4.2 |
| 6.5  | 5.5  | 23369.6096 | -3.9 | 42.5 | 41.5 | 23381.6228 | 0.0  |
| 7.5  | 6.5  | 23369.8444 | -3.1 | 2.5  | 3.5  | 23367.5856 | 3.7  |
| 8.5  | 7.5  | 23370.0839 | -3.3 | 3.5  | 4.5  | 23367.4098 | 0.2  |
| 9.5  | 8.5  | 23370.3298 | -2.7 | 4.5  | 5.5  | 23367.2407 | -2.2 |
| 10.5 | 9.5  | 23370.5803 | -3.1 | 5.5  | 6.5  | 23367.0803 | -1.6 |
| 11.5 | 10.5 | 23370.8321 | -7.8 | 6.5  | 7.5  | 23366.9261 | -0.4 |
| 12.5 | 11.5 | 23371.0953 | -6.8 | 7.5  | 8.5  | 23366.7753 | -1.4 |
| 13.5 | 12.5 | 23371.3618 | -8.1 | 8.5  | 9.5  | 23366.6326 | 0.1  |
| 14.5 | 13.5 | 23371.6375 | -5.8 | 9.5  | 10.5 | 23366.4965 | 2.5  |
| 15.5 | 14.5 | 23371.9138 | -8.6 | 10.5 | 11.5 | 23366.3628 | 1.7  |
| 16.5 | 15.5 | 23372.1988 | -8.3 | 11.5 | 12.5 | 23366.2351 | 1.2  |
| 17.5 | 16.5 | 23372.4904 | -7.1 | 12.5 | 13.5 | 23366.1115 | -0.8 |
| 18.5 | 17.5 | 23372.7866 | -7.0 | 13.5 | 14.5 | 23365.9975 | 1.2  |
| 19.5 | 18.5 | 23373.0943 | -1.0 | 14.5 | 15.5 | 23365.8865 | 0.4  |
| 20.5 | 19.5 | 23373.3998 | -2.9 | 15.5 | 16.5 | 23365.7820 | 0.5  |
| 21.5 | 20.5 | 23373.7144 | -1.4 | 16.5 | 17.5 | 23365.6819 | -0.7 |
| 22.5 | 21.5 | 23374.0317 | -2.9 | 17.5 | 18.5 | 23365.5885 | -0.9 |
| 23.5 | 22.5 | 23374.3569 | -2.2 | 18.5 | 19.5 | 23365.5004 | -1.4 |
| 24.5 | 23.5 | 23374.6894 | 0.1  | 19.5 | 20.5 | 23365.4201 | 0.1  |
| 25.5 | 24.5 | 23375.0225 | -2.7 | 20.5 | 21.5 | 23365.3390 | -4.9 |
| 26.5 | 25.5 | 23375.3625 | -4.4 | 21.5 | 22.5 | 23365.2703 | -3.2 |
| 27.5 | 26.5 | 23375.7137 | -0.6 | 22.5 | 23.5 | 23365.2046 | -4.2 |
| 28.5 | 27.5 | 23376.0631 | -4.4 | 24.5 | 25.5 | 23365.0948 | -2.0 |
| 29.5 | 28.5 | 23376.4231 | -3.3 | 25.5 | 26.5 | 23365.0490 | -0.4 |
| 30.5 | 29.5 | 23376.7826 | -8.5 | 26.5 | 27.5 | 23365.0086 | 0.8  |
| 31.5 | 30.5 | 23377.1547 | -6.9 | 3.5  | 3.5  | 23368.2755 | 2.2  |
| 32.5 | 31.5 | 23377.5363 | -1.6 | 4.5  | 4.5  | 23368.2954 | -3.2 |
| 33.5 | 32.5 | 23377.9133 | -6.7 | 5.5  | 5.5  | 23368.3274 | -2.1 |
| 34.5 | 33.5 | 23378.3018 | -6.1 | 6.5  | 6.5  | 23368.3645 | -1.4 |
| 35.5 | 34.5 | 23378.6947 | -7.0 | 7.5  | 7.5  | 23368.4055 | -2.6 |
| 36.5 | 35.5 | 23379.0986 | -2.7 | 8.5  | 8.5  | 23368.4549 | -0.9 |
| 37.5 | 36.5 | 23379.5046 | -2.2 | 9.5  | 9.5  | 23368.5045 | -4.7 |
| 38.5 | 37.5 | 23379.9145 | -3.6 | 10.5 | 10.5 | 23368.5626 | -5.6 |
| 39.5 | 38.5 | 23380.3313 | -4.1 |      |      |            |      |

[23.61]<sup>4</sup>Γ<sub>7/2</sub><sup>-4</sup>Φ<sub>5/2</sub>(0,0)

| J'   | J''  | Observed   | O-C   | J'   | J''  | Observed   | O-C  |
|------|------|------------|-------|------|------|------------|------|
| 3.5  | 2.5  | 23575.5732 | -2.2  | 19.5 | 19.5 | 23575.5455 | 6.1  |
| 4.5  | 3.5  | 23575.7814 | -0.8  | 20.5 | 20.5 | 23575.6099 | 2.3  |
| 5.5  | 4.5  | 23575.9819 | -10.3 | 21.5 | 21.5 | 23575.6820 | 2.8  |
| 6.5  | 5.5  | 23576.2060 | 0.4   | 22.5 | 22.5 | 23575.7570 | 2.8  |
| 7.5  | 6.5  | 23576.4231 | 0.8   | 23.5 | 23.5 | 23575.8347 | 2.1  |
| 8.5  | 7.5  | 23576.6439 | 1.6   | 24.5 | 24.5 | 23575.9138 | -0.6 |
| 9.5  | 8.5  | 23576.8658 | 0.3   | 25.5 | 25.5 | 23575.9998 | 0.1  |
| 10.5 | 9.5  | 23577.0909 | -1.2  | 26.5 | 26.5 | 23576.0902 | 1.8  |
| 11.5 | 10.5 | 23577.3228 | 0.8   | 27.5 | 27.5 | 23576.1780 | -2.5 |
| 12.5 | 11.5 | 23577.5536 | -1.7  | 28.5 | 28.5 | 23576.2760 | -0.1 |
| 13.5 | 12.5 | 23577.7928 | 1.0   | 29.5 | 29.5 | 23576.3748 | -0.4 |
| 14.5 | 13.5 | 23578.0323 | 0.6   | 30.5 | 30.5 | 23576.4795 | 1.7  |
| 15.5 | 14.5 | 23578.2738 | -1.1  | 3.5  | 4.5  | 23574.0323 | -7.6 |
| 16.5 | 15.5 | 23578.5235 | 2.1   | 4.5  | 5.5  | 23573.8572 | -5.6 |
| 17.5 | 16.5 | 23578.7743 | 3.0   | 5.5  | 6.5  | 23573.6817 | -7.3 |
| 18.5 | 17.5 | 23579.0235 | -1.1  | 6.5  | 7.5  | 23573.5179 | -0.7 |
| 19.5 | 18.5 | 23579.2840 | 2.8   | 7.5  | 8.5  | 23573.3515 | 0.1  |
| 20.5 | 19.5 | 23579.5393 | -1.9  | 8.5  | 9.5  | 23573.1874 | -0.2 |
| 21.5 | 20.5 | 23579.8064 | 1.9   | 9.5  | 10.5 | 23573.0237 | -3.4 |
| 22.5 | 21.5 | 23580.0733 | 2.1   | 10.5 | 11.5 | 23572.8730 | 3.1  |
| 23.5 | 22.5 | 23580.3415 | 0.2   | 11.5 | 12.5 | 23572.7133 | -2.7 |
| 24.5 | 23.5 | 23580.6187 | 3.8   | 12.5 | 13.5 | 23572.5637 | -1.8 |
| 25.5 | 24.5 | 23580.8939 | 2.1   | 13.5 | 14.5 | 23572.4197 | 1.4  |
| 26.5 | 25.5 | 23581.1674 | -4.7  | 14.5 | 15.5 | 23572.2749 | 0.4  |
| 28.5 | 27.5 | 23581.7435 | 0.4   | 15.5 | 16.5 | 23572.1348 | 0.8  |
| 30.5 | 29.5 | 23582.3312 | 3.2   | 16.5 | 17.5 | 23571.9985 | 1.6  |
| 31.5 | 30.5 | 23582.6265 | 0.9   | 17.5 | 18.5 | 23571.8648 | 1.6  |
| 32.5 | 31.5 | 23582.9230 | -3.7  | 18.5 | 19.5 | 23571.7368 | 4.0  |
| 33.5 | 32.5 | 23583.2259 | -5.4  | 19.5 | 20.5 | 23571.6053 | -0.6 |
| 34.5 | 33.5 | 23583.5404 | 1.0   | 20.5 | 21.5 | 23571.4833 | 1.0  |
| 35.5 | 34.5 | 23583.8443 | -6.8  | 21.5 | 22.5 | 23571.3648 | 2.6  |
| 4.5  | 4.5  | 23574.9151 | -3.4  | 22.5 | 23.5 | 23571.2484 | 2.9  |
| 5.5  | 5.5  | 23574.9381 | 1.5   | 23.5 | 24.5 | 23571.1330 | 0.8  |
| 6.5  | 6.5  | 23574.9588 | 0.8   | 24.5 | 25.5 | 23571.0219 | -0.4 |
| 7.5  | 7.5  | 23574.9821 | -0.7  | 25.5 | 26.5 | 23570.9202 | 4.3  |
| 8.5  | 8.5  | 23575.0102 | -0.7  | 26.5 | 27.5 | 23570.8145 | 1.5  |
| 9.5  | 9.5  | 23575.0425 | 0.3   | 27.5 | 28.5 | 23570.7141 | 0.6  |
| 10.5 | 10.5 | 23575.0775 | 0.6   | 28.5 | 29.5 | 23570.6177 | 0.1  |
| 11.5 | 11.5 | 23575.1146 | -0.4  | 29.5 | 30.5 | 23570.5270 | 1.9  |
| 12.5 | 12.5 | 23575.1589 | 2.6   | 30.5 | 31.5 | 23570.4339 | -2.2 |
| 13.5 | 13.5 | 23575.2006 | -0.4  | 31.5 | 32.5 | 23570.3535 | 2.8  |
| 14.5 | 14.5 | 23575.2499 | 0.9   | 32.5 | 33.5 | 23570.2684 | -0.4 |
| 15.5 | 15.5 | 23575.2997 | -0.7  | 33.5 | 34.5 | 23570.1874 | -3.1 |
| 16.5 | 16.5 | 23575.3557 | 0.6   | 34.5 | 35.5 | 23570.1113 | -4.5 |
| 17.5 | 17.5 | 23575.4161 | 2.9   | 35.5 | 36.5 | 23570.0426 | -2.0 |
| 18.5 | 18.5 | 23575.4778 | 3.2   |      |      |            |      |

[23.61]<sup>4</sup>Γ<sub>9/2</sub>-<sup>4</sup>Φ<sub>7/2</sub> (0,0)

| J'   | J''  | Observed   | O-C  | J'   | J''  | Observed   | O-C  |
|------|------|------------|------|------|------|------------|------|
| 4.5  | 3.5  | 23651.8823 | -2.4 | 25.5 | 25.5 | 23651.3329 | -2.0 |
| 5.5  | 4.5  | 23652.0858 | 4.1  | 26.5 | 26.5 | 23651.3669 | 3.8  |
| 6.5  | 5.5  | 23652.2826 | 3.0  | 27.5 | 27.5 | 23651.3916 | -1.3 |
| 7.5  | 6.5  | 23652.4834 | 5.0  | 28.5 | 28.5 | 23651.4163 | -7.8 |
| 8.5  | 7.5  | 23652.6785 | 0.4  | 29.5 | 29.5 | 23651.4590 | 2.1  |
| 9.5  | 8.5  | 23652.8810 | 2.3  | 30.5 | 30.5 | 23651.4944 | 3.1  |
| 10.5 | 9.5  | 23653.0791 | -1.2 | 31.5 | 31.5 | 23651.5267 | -0.7 |
| 11.5 | 10.5 | 23653.2843 | 1.5  | 32.5 | 32.5 | 23651.5651 | -0.1 |
| 12.5 | 11.5 | 23653.4856 | -0.7 | 4.5  | 5.5  | 23649.9633 | 0.1  |
| 13.5 | 12.5 | 23653.6917 | 0.9  | 5.5  | 6.5  | 23649.7778 | 1.9  |
| 14.5 | 13.5 | 23653.8996 | 3.2  | 6.5  | 7.5  | 23649.5867 | -2.8 |
| 15.5 | 14.5 | 23654.1054 | 2.4  | 7.5  | 8.5  | 23649.3979 | -6.1 |
| 16.5 | 15.5 | 23654.3063 | -4.3 | 8.5  | 9.5  | 23649.2204 | 1.0  |
| 17.5 | 16.5 | 23654.5170 | -2.4 | 9.5  | 10.5 | 23649.0366 | 0.8  |
| 22.5 | 21.5 | 23655.5810 | 0.4  | 10.5 | 11.5 | 23648.8528 | -0.4 |
| 23.5 | 22.5 | 23655.7988 | 2.2  | 11.5 | 12.5 | 23648.6684 | -3.1 |
| 24.5 | 23.5 | 23656.0118 | -2.1 | 12.5 | 13.5 | 23648.4922 | 1.4  |
| 25.5 | 24.5 | 23656.2317 | -0.9 | 13.5 | 14.5 | 23648.3111 | -0.1 |
| 26.5 | 25.5 | 23656.4539 | 1.2  | 14.5 | 15.5 | 23648.1333 | 0.7  |
| 27.5 | 26.5 | 23656.6718 | -2.5 | 15.5 | 16.5 | 23647.9569 | 1.9  |
| 28.5 | 27.5 | 23656.8995 | 2.2  | 16.5 | 17.5 | 23647.7795 | 0.9  |
| 29.5 | 28.5 | 23657.1230 | 1.0  | 17.5 | 18.5 | 23647.6060 | 2.7  |
| 30.5 | 29.5 | 23657.3488 | 0.6  | 18.5 | 19.5 | 23647.4279 | -1.2 |
| 31.5 | 30.5 | 23657.5767 | 0.7  | 19.5 | 20.5 | 23647.2571 | 0.9  |
| 32.5 | 31.5 | 23657.8075 | 2.0  | 20.5 | 21.5 | 23647.0847 | 0.3  |
| 33.5 | 32.5 | 23658.0403 | 3.5  | 21.5 | 22.5 | 23646.9154 | 1.4  |
| 34.5 | 33.5 | 23658.2711 | 1.2  | 22.5 | 23.5 | 23646.7464 | 1.6  |
| 35.5 | 34.5 | 23658.5079 | 3.0  | 23.5 | 24.5 | 23646.5767 | -0.2 |
| 36.5 | 35.5 | 23658.7474 | 5.6  | 24.5 | 25.5 | 23646.4092 | -1.2 |
| 37.5 | 36.5 | 23658.9853 | 4.7  | 25.5 | 26.5 | 23646.2448 | -0.5 |
| 38.5 | 37.5 | 23659.2256 | 4.0  | 26.5 | 27.5 | 23646.0825 | 0.8  |
| 39.5 | 38.5 | 23659.4636 | -1.0 | 27.5 | 28.5 | 23645.9175 | -2.1 |
| 40.5 | 39.5 | 23659.7091 | -0.7 | 28.5 | 29.5 | 23645.7577 | -1.3 |
| 41.5 | 40.5 | 23659.9523 | -4.9 | 29.5 | 30.5 | 23645.5989 | -1.1 |
| 11.5 | 11.5 | 23651.0714 | -1.8 | 30.5 | 31.5 | 23645.4408 | -1.9 |
| 14.5 | 14.5 | 23651.1071 | -3.4 | 31.5 | 32.5 | 23645.2874 | 0.3  |
| 15.5 | 15.5 | 23651.1231 | -1.9 | 32.5 | 33.5 | 23645.1306 | -2.6 |
| 16.5 | 16.5 | 23651.1385 | -2.1 | 33.5 | 34.5 | 23644.9804 | -0.7 |
| 18.5 | 18.5 | 23651.1721 | -3.1 | 34.5 | 35.5 | 23644.8283 | -2.6 |
| 19.5 | 19.5 | 23651.1938 | -0.4 | 35.5 | 36.5 | 23644.6813 | -1.4 |
| 21.5 | 21.5 | 23651.2369 | 1.0  | 36.5 | 37.5 | 23644.5331 | -3.3 |
| 22.5 | 22.5 | 23651.2555 | -3.2 | 37.5 | 38.5 | 23644.3927 | 0.6  |
| 23.5 | 23.5 | 23651.2862 | 3.5  | 38.5 | 39.5 | 23644.2486 | -1.3 |
| 24.5 | 24.5 | 23651.3082 | 0.1  | 39.5 | 40.5 | 23644.1092 | -0.8 |
| 25.5 | 25.5 | 23651.3329 | -2.0 |      |      |            |      |

[23.48]<sup>4</sup>Γ<sub>5/2</sub><sup>-4</sup>Φ<sub>3/2</sub>(1,1)

| J'   | J''  | Observed   | O-C   | J'   | J''  | Observed   | O-C  |
|------|------|------------|-------|------|------|------------|------|
| 13.5 | 12.5 | 23414.1393 | 10.2  | 15.5 | 16.5 | 23408.3230 | -1.4 |
| 14.5 | 13.5 | 23414.3631 | 8.0   | 16.5 | 17.5 | 23408.1632 | -0.9 |
| 15.5 | 14.5 | 23414.5929 | 9.7   | 17.5 | 18.5 | 23408.0064 | 0.5  |
| 16.5 | 15.5 | 23414.8191 | 5.8   | 18.5 | 19.5 | 23407.8517 | 1.8  |
| 17.5 | 16.5 | 23415.0522 | 6.7   | 19.5 | 20.5 | 23407.6982 | 2.1  |
| 18.5 | 17.5 | 23415.2874 | 7.6   | 20.5 | 21.5 | 23407.5455 | 1.1  |
| 19.5 | 18.5 | 23415.5186 | 2.5   | 21.5 | 22.5 | 23407.3947 | -0.3 |
| 20.5 | 19.5 | 23415.7530 | -1.5  | 22.5 | 23.5 | 23407.2513 | 3.5  |
| 21.5 | 20.5 | 23415.9915 | -3.4  | 23.5 | 24.5 | 23407.1068 | 4.0  |
| 22.5 | 21.5 | 23416.2384 | 1.0   | 24.5 | 25.5 | 23406.9584 | -1.6 |
| 23.5 | 22.5 | 23416.4765 | -5.4  | 25.5 | 26.5 | 23406.8203 | 0.9  |
| 24.5 | 23.5 | 23416.7237 | -4.7  | 26.5 | 27.5 | 23406.6852 | 4.1  |
| 25.5 | 24.5 | 23416.9739 | -3.1  | 27.5 | 28.5 | 23406.5471 | 2.2  |
| 26.5 | 25.5 | 23417.2247 | -3.0  | 28.5 | 29.5 | 23406.4116 | 0.6  |
| 27.5 | 26.5 | 23417.4772 | -3.2  | 29.5 | 30.5 | 23406.2836 | 4.2  |
| 28.5 | 27.5 | 23417.7301 | -5.0  | 30.5 | 31.5 | 23406.1545 | 4.5  |
| 29.5 | 28.5 | 23417.9843 | -7.5  | 31.5 | 32.5 | 23406.0234 | 0.6  |
| 30.5 | 29.5 | 23418.2488 | -1.8  | 32.5 | 33.5 | 23405.9007 | 2.8  |
| 32.5 | 31.5 | 23418.7668 | -7.4  | 33.5 | 34.5 | 23405.7772 | 2.0  |
| 33.5 | 32.5 | 23419.0356 | -3.5  | 34.5 | 35.5 | 23405.6522 | -2.6 |
| 34.5 | 33.5 | 23419.3015 | -4.5  | 35.5 | 36.5 | 23405.5364 | -0.3 |
| 35.5 | 34.5 | 23419.5740 | -0.9  | 36.5 | 37.5 | 23405.4190 | -1.9 |
| 36.5 | 35.5 | 23419.8479 | 2.1   | 37.5 | 38.5 | 23405.3052 | -2.1 |
| 37.5 | 36.5 | 23420.1227 | 3.9   | 38.5 | 39.5 | 23405.1935 | -2.5 |
| 38.5 | 37.5 | 23420.4006 | 6.9   | 39.5 | 40.5 | 23405.0838 | -3.3 |
| 39.5 | 38.5 | 23420.6768 | 6.1   | 6.5  | 6.5  | 23411.3387 | 5.8  |
| 6.5  | 7.5  | 23409.8665 | 1.4   | 10.5 | 10.5 | 23411.4098 | 0.9  |
| 7.5  | 8.5  | 23409.6721 | -13.2 | 12.5 | 12.5 | 23411.4528 | -6.8 |
| 8.5  | 9.5  | 23409.5021 | -5.6  | 14.5 | 14.5 | 23411.5182 | -0.5 |
| 9.5  | 10.5 | 23409.3257 | -6.5  | 16.5 | 16.5 | 23411.5869 | 0.6  |
| 10.5 | 11.5 | 23409.1542 | -4.6  | 19.5 | 19.5 | 23411.6986 | -5.0 |
| 11.5 | 12.5 | 23408.9855 | -2.1  | 20.5 | 20.5 | 23411.7510 | 4.1  |
| 12.5 | 13.5 | 23408.8160 | -2.6  | 21.5 | 21.5 | 23411.7897 | -2.7 |
| 13.5 | 14.5 | 23408.6512 | -0.5  | 22.5 | 22.5 | 23411.8464 | 6.4  |
| 14.5 | 15.5 | 23408.4844 | -2.6  |      |      |            |      |
